1  
2  
3  
4  
5  
6  
7  
8  
9  
10  
11  
12  
13  
14  
15  
16  
17  
18  
19  
20  
21  
22  
23  
24  
25  
26  
27  
28  
29

**Visual control of landing maneuvers in houseflies  
on vertical and inverted surfaces**

Sujay Balebail, Satish K Raja and Sanjay P. Sane\*

National Centre for Biological Sciences (NCBS)

Tata Institute of Fundamental Research

GKVK campus, Bellary road,

Bangalore 560065

INDIA

[\\*sane@ncbs.res.in](mailto:*sane@ncbs.res.in)

30

## ABSTRACT

31 Landing maneuvers in flies are complex behaviors that may be conceptually decomposed into  
32 a sequence of modular behaviors such as body deceleration, extension of legs, and body  
33 rotations which are coordinated to ensure controlled touchdown. The composite nature of  
34 these behaviors means that there is variability in the kinematics of landing maneuvers,  
35 making it difficult to identify the general rules that govern this behavior. Many previous  
36 studies have relied on tethered preparations to study landing behaviors, but tethering  
37 constrains some behavioral modules to operate in an open feedback control loop while others  
38 remain in closed-loop, thereby inducing experimental artefacts. On the other hand, freely  
39 flying insects are hard to precisely control, which may also increase behavioral variability.  
40 One approach towards understanding the general rules underlying landing behavior is to  
41 determine the common elements of landing kinematics on surfaces that are oriented in  
42 different ways. We conducted a series of experiments in which the houseflies, *Musca*  
43 *Domestica*, were lured to specific visual targets on either vertical or inverted horizontal  
44 substrates. These conditions elicited landing behaviors in the flies that could be captured  
45 accurately using multiple high-speed video cameras. We filmed the houseflies landing on  
46 surfaces oriented along two directions: vertical (*vertical landings*), and upside down (*inverted*  
47 *landings*). Our experiments reveal that flies that are able to land feet-first in a controlled  
48 manner must satisfy specific criteria, failing which their landing performance is compromised  
49 causing their heads to bump into the surface during landing. Flies landing smoothly on both  
50 surfaces initiate deceleration at approximately fixed distances from the substrate and in direct  
51 proportion to the component of flight velocity normal to the landing surface. The ratio of  
52 perpendicular distance to the substrate and velocity at the onset of deceleration was  
53 conserved, despite the large differences in the mechanics of the vertical vs. inverted landings.  
54 Flies extend their legs independently of distance from the landing surface or their approach  
55 velocity normal to the surface, regardless of the orientation of the landing substrate. Together,  
56 these results show that the visual initiation of deceleration is robust to orientation of the  
57 landing surface, whereas the initiation of leg-extension may be context-dependent and  
58 variable which allows flies to land on substrates of various orientations in a versatile manner.  
59 These findings may also be of interest to roboticists that are interested in developing flapping  
60 robots that can land on surfaces of different orientations.

61

62

## INTRODUCTION

63 Safe landing on a substrate is a key aspect of insect flight behavior. In their natural world, the  
64 surfaces on which insects land are oriented in diverse ways, and hence the underlying  
65 behavioral principles that guide their landing behavior must enable such versatility. From the  
66 controls' perspective, smooth landing requires insects to rapidly sense and precisely react to  
67 an approaching substrate in a manner that is robust to diverse orientations the landing surface.  
68 It has been previously suggested that landing behavior can be subdivided into many distinct,  
69 independently-activated behaviors, and may therefore be considered as 'modular' (van  
70 Breugel and Dickinson, 2012). While landing, insects typically reduce their approach  
71 velocities (Baird et al., 2013; Lee et al., 1991; Lee et al., 1993; Srinivasan et al., 2000; van  
72 Breugel and Dickinson, 2012; Wagner, 1982), extend their legs (Goodman, 1960; Evangelista  
73 et al., 2010; Hyzer, 1962; Lee et al., 1993; Reber et al., 2016a; Reber et al., 2016b; van  
74 Breugel and Dickinson, 2012), and align their body parallel the landing surface (Hyzer, 1962;  
75 Zhao et al., 2017). Moreover, insects land on objects of different textures, flexibility, and  
76 orientations including inverted surfaces (Evangelista et al., 2010; Hyzer, 1962; Reber et al.,  
77 2016a), suggesting a great degree of adaptability of their landing behavior.

78         What basic strategies underlie the versatile landing ability of insects? To address this  
79 question, we must consider the following key points. First, any strategy to initiate  
80 deceleration must ensure that the animal has sufficient time to achieve low contact velocities,  
81 thereby avoiding injuries upon impact. The rules used to determine the onset of deceleration  
82 have been studied in freely-flying houseflies *Musca domestica* (Wagner, 1982) and fruit flies  
83 *Drosophila melanogaster* (van Breugel and Dickinson, 2012). An important parameter in  
84 these studies is the ratio of the distance of the flying insect from the landing object and the  
85 velocity component in the direction of the object, which is conventionally termed *tau* (e.g.  
86 Lee, 1980 and associated discussion by Kalmus; also Baird et al, 2013). The value of *tau* at  
87 any time instant represents the time to collision with the landing surface, as the animal flies  
88 towards the landing object. Wagner (1982) showed that houseflies approaching a spherical  
89 landing object initiated deceleration when the value of *tau* fell below a threshold value. Thus,  
90 flies approaching an object at higher velocities initiated deceleration proportionately further  
91 away from the object i.e. at a constant value of *tau*.

92         To a landing fly, the main sensory cues that are available are the rates of optic flow on  
93 their retina, which indicate how fast the object is approaching the fly. Accounting for this,

94 Wagner et al (1982) proposed the Relative Retinal Expansion Velocity (RREV) model, which  
95 suggests that flies initiate deceleration at a critical value of the ratio of retinal expansion  
96 velocity to the retinal size of an object. Another model called the Retinal Size-Dependent  
97 Expansion Threshold (RSDET) Model was proposed to explain the data on landing  
98 maneuvers in *Drosophila melanogaster* (van Breugel and Dickinson, 2012). Specifically,  
99 their instantaneous approach speed was proportional to the logarithm of the angular size  
100 subtended by the post on the retina. The RSDET Model (van Breugel and Dickinson, 2012)  
101 specifically addressed the onset of deceleration in *Drosophila* as they approached a  
102 cylindrical post, and proposed that deceleration is initiated at a threshold value of the retinal  
103 size dependent expansion of the object on the retina. How fast the fly can cross this threshold  
104 depends on the its speed of approach, but not on the physical dimensions of the object. Thus,  
105 a small object that expands slowly is as likely to trigger onset of deceleration as a large object  
106 that expands rapidly. Similarly, a fly that is further away from flying faster would initiate  
107 deceleration as would a fly that is flying slowly but is closer to the substrate. In most practical  
108 matters, the RSDET model is similar to the RREV or tau-estimation models.

109 While landing, the rate of deceleration needs to be controlled to achieve smooth  
110 touchdown. Birds such as hummingbirds (Lee et al., 1991), and pigeons (Lee et al., 1993)  
111 control deceleration by maintaining the rate of change of  $\tau$  with time at a constant value  
112 between 0.5 and 1. Honeybees, on the other hand, keep  $\tau$  at a fixed value after initiating  
113 deceleration, ensuring that the component of flight velocity normal to the landing surface  
114 reduces linearly with displacement from the surface (Baird et al., 2013; Srinivasan et al.,  
115 2000). Freely flying insects extend their legs before contacting the surface (Evangelista et al.,  
116 2010; Hyzer, 1962; Lee et al., 1993; Reber et al., 2016a; Reber et al., 2016b; van Breugel and  
117 Dickinson, 2012). The rules governing the initiation of the leg-extension response in free  
118 flight has been the subject of many previous studies (Goodman, 1960; Evangelista et al.,  
119 2010; Lee et al., 1993; Reber et al., 2016a; van Breugel and Dickinson, 2012; Baird et al,  
120 2013). For instance, pigeons approaching a perch to land, begin extending their legs at a fixed  
121 value of  $\tau$  (Lee et al., 1993). When honeybees (Evangelista et al., 2010) and bumblebees  
122 (Reber et al., 2016a) approached plane surfaces, they were observed to hover and extend their  
123 legs at a constant distance from the landing surface, irrespective of the inclination of the  
124 surface. When *Drosophila melanogaster* approached a cylindrical post, the onset of leg-  
125 extension appeared to be independent of approach velocity, depending instead on a threshold

126 distance from the post or threshold angle subtended by the post on the retina (van Breugel  
127 and Dickinson, 2012).

128         These modules can be independently activated; for example, presentation of front-to-  
129 back optic flow stimuli to tethered insects elicits a leg-extension response (Borst, 1986;  
130 Borst, 1989; Borst and Bahde, 1986, 1987, 1988a,b, and 1990; Coggshall, 1972; De Talens  
131 and Ferreti, 1970; Eckert, 1980; Goodman, 1960; Tammero and Dickinson, 2002) even  
132 though there is no physical deceleration or change in body pitch. This behavior is thought to  
133 be analogous to a freely-flying insect extending its legs before touchdown to prevent a crash  
134 landing. In tethered houseflies, the time course of leg-extension remains fairly constant  
135 regardless of the nature of the releasing stimulus. However, the latency of the leg-extension  
136 response depends on the optic flow stimulus (Borst, 1986), and is a function of the size,  
137 velocity, and contrast of looming stimuli (Borst, 1990; Borst and Bahde, 1988a; Goodman,  
138 1960). Besides extending their legs, tethered flies also reduce their thrust in response to a  
139 looming stimulus, and the onsets of reduction in thrust is correlated with leg-extension (Borst  
140 and Bahde, 1988a).

141         Despite the extensive research on landing responses, several questions have remained  
142 largely unanswered that relate to the mutual coordination between leg extension and  
143 deceleration of the body. Do flies follow certain rules for the initiation of these two modules  
144 of landing? Are these rules dependent on the orientation of the landing surface? Are these  
145 modules initiated using the same rules, or are they initiated independently? To address these  
146 questions, it is necessary to determine the generalities of landing responses, irrespective of  
147 orientation of landing. Here, we filmed at high frame rates (3000 or 4000 fps), the landing  
148 behavior of houseflies (*Musca domestica*) on plane surfaces oriented along two directions,  
149 vertical (vertical landings) and upside down (inverted landings).

150         Flies approaching the landing surface at higher velocities must slow down at an  
151 appropriate distance from the surface and also extend their legs to avoid injuries upon impact.  
152 We hypothesized that this imposes on them the need for coordination between body  
153 deceleration and leg extension responses. Moreover, such coordination is required regardless  
154 of the contexts in which these behaviors occur. Previous free-flight studies indicated that  
155 flying insects begin leg-extension at a fixed displacement from the landing surface in which  
156 case the inter-trial variability in displacement at the beginning of leg-extension is expected to  
157 be low. Tethered flight studies in houseflies indicate that the onsets of deceleration and leg-

158 extension are correlated (Borst and Bahde, 1988a), implying that the similar visual cues  
159 initiate both responses, however with different latencies. If so, we expect a fixed time  
160 difference between the onsets of deceleration and leg-extension.

161

162

## MATERIALS AND METHODS

### 163 **Animals**

164 Adult houseflies (*Musca domestica*) were captured from the wild and stored in a container  
165 with ad libitum access to sucrose and water.

### 166 **Experimental setup and protocol**

#### 167 *Vertical landings*

168 The flight chamber for filming vertical landings comprised of a transparent plexiglass box  
169 (28 cm × 28 cm × 28 cm). Three 4.5 cm × 4.5 cm pieces of chart paper were attached to form  
170 an equilateral prism-shaped object and its edges were lined with black strips. This object was  
171 placed approximately in the center of the chamber, and served as the landing substrate for the  
172 fly. The chamber was lit by a studio light (Simpex Compact 300, Simpex Industries, Delhi,  
173 India) to ~3000 lux (measured using a Center 337 light meter, Center Technology  
174 Corporation, Taipei, Taiwan). Flies were introduced into the filming chamber from the top.  
175 Landings on the object were recorded at 3000 fps by two synced high speed cameras  
176 (Phantom v7.3, Vision Research, Wayne, NJ, USA; Fig 1 A, Ai). The field of view of both  
177 high-speed cameras were calibrated using a standard object. The flies generally performed a  
178 saccade towards the object before landing, as has also been reported in the case of *Drosophila*  
179 *melanogaster* (van Breugel and Dickinson, 2012). The frame where the saccade appeared to  
180 end was selected as the start point of each video. The frame of first contact with the landing  
181 surface was chosen as the end point of the video.

#### 182 *Inverted landings*

183 The flight chamber for filming inverted landings comprised of a glass box (5 cm × 5 cm × 10  
184 cm) with a translucent filter paper ceiling (Fig 1B). A black square outline (side length= 1.5  
185 cm, line thickness= 2 mm) was drawn approximately on the center of the ceiling, to provide  
186 an expansion stimulus as the fly approached the ceiling. A batch of 3-6 flies were starved for  
187 10-12 hours, anesthetized *via* a 2.5 min cold shock (-20°C) and placed in the filming

188 chamber. The chamber was illuminated by a UV torch placed above the ceiling (to attract  
189 flies), two 150 W halogen lamps, and two stereomicroscope lights (Nikon SMZ25; Nikon  
190 Corporation, Tokyo, Japan), to ~30000 lux. The anesthetized flies were allowed to recover  
191 for 10-15 minutes. Landings on the ceiling were recorded by three synced high-speed  
192 cameras filming at 4000 fps (two phantom v7.3 and one phantom v611; Fig. 1B, Bi). No  
193 more than one landing was recorded per batch of flies, to avoid pseudo-replication. The field  
194 of view of the three cameras were calibrated using a standard object. In most trials, the fly  
195 took off from a lateral wall, rotated about its longitudinal axis (roll rotation) by almost 360°,  
196 and then ascended towards the ceiling. The frame in which the roll rotation ended was  
197 determined by a careful observation of the recording. It was chosen as the as the start point  
198 and the frame of first contact with the landing surface was selected as the end point of each  
199 video.

#### 200 *Digitization and computation of flight variables*

201 Videos of landings were digitized using custom MATLAB software (Hedrick, 2008;  
202 Mathworks, Natick, MA, USA). We digitized the tips of the head and abdomen, and three  
203 points on the landing surface (Fig. 1Ai, Bi). The time series of the digitized points was  
204 filtered using a 4th order low-pass filter (Butterworth) with a cut-off frequency 30 Hz. This  
205 was done to eliminate the influence of body rotations, whose mean frequency was  $50 \pm 23$   
206 ( $\mu \pm \sigma$ ) Hz (Fig. S1A). Before applying the filter, the ends of the time series data were  
207 extrapolated using quadratic functions to reduce edge effects (Walker, 1998). The coordinates  
208 of the midpoint of the line joining the head and abdomen tips was computed (henceforth  
209 termed “midpoint”) at each frame to determine the broad trajectories during landing (Fig 1 C,  
210 D). Two flight variables were computed from the digitized points: First, the perpendicular  
211 (shortest) distance of the midpoint from the landing surface (d) and second, the component of  
212 flight velocity perpendicular to the plane of the landing surface (v), for each frame in the  
213 following manner:

$$v_i = \frac{d_{i-1} - d_{i+1}}{T}$$

214 in which the subscript i stands for the frame number and T is the time interval between (i-1)th  
215 and (i+1) frames (2/3 ms for vertical landings and 1/2 ms for inverted landings (Fig 1 E, F)).

#### 216 *Identifying the onsets of deceleration and leg-extension*

217 We wrote custom code in MATLAB to identify all the local maxima and minima in the plots  
218 of perpendicular velocity ( $v$ ) vs time (Fig. 2A-B, E-F) and distance from substrate as a  
219 function of perpendicular velocity (Fig 2 C-D, G-H). Trials in which the final extremum  
220 before touchdown was a minimum were classified as having no deceleration before  
221 touchdown (Fig. 2B, F). In the remaining trials, the final maximum velocity before first  
222 contact with the landing surface was classified as the onset of deceleration (Fig. 2A, E).

223 Unlike the onset of deceleration which required the above calculations, the onset of leg-  
224 extension could be visually determined from a close examination of the videos. The frame in  
225 which either one or both the front legs began to be raised dorsally was chosen as the frame of  
226 onset of leg-extension. In 6 out of the 18 vertical landing trials, the fly had extended its legs  
227 before arriving in the field of view of both cameras. Therefore, the frame of onset of leg-  
228 extension is unknown for these trials. In 10 out of 32 inverted landing trials, the fly extended  
229 its legs at the takeoff point and kept them extended. For these trials, leg extension could not  
230 be attributed to landing *per se*, and hence we did not include these trials in the analysis of the  
231 initiation of leg extension.

#### 232 *Testing hypotheses for the initiation of deceleration and leg-extension*

233 To test whether flies initiate both components of the landing behavior at a distance that is  
234 proportional to perpendicular velocity (constant *tau* hypothesis), we plotted distance from the  
235 substrate ( $d$ ) against perpendicular velocity ( $v$ ) at the onsets of deceleration (Fig. 2 C, G; Fig.  
236 3 C-D; Fig. 5 A-B) and leg-extension (Fig. 2 D, H; Fig. 4 A-B), and computed the coefficient  
237 of determination ( $R^2$ ) of the best fit line using in-built functions in MATLAB. The slope of  
238 this best-fit line is defined as *tau*. High  $R^2$  values would support the constant *tau* hypothesis.  
239 If flies initiate a module at a fixed distance from the landing platform, then the inter-trial  
240 variability in distance at the onset of the module is expected to be low. If flies utilize the  
241 same cues for releasing both deceleration and leg-extension but with different latencies, we  
242 should expect stereotypy in the time difference between the modules. We next plotted time to  
243 collision to the landing surface at the onset of leg-extension (time difference between the  
244 onset of leg-extension and first contact with the landing surface) as a function of time to  
245 collision to the landing surface at the onset of deceleration (time difference between the onset  
246 of deceleration and first contact with the landing surface; Fig. 5 E-F), and fit lines to the  
247 plots. High  $R^2$  values would support the hypothesis of both modules being initiated by the  
248 same stimuli.



249 *Statistical tests*

250 Because we could not *a priori* assume normal distribution of the data on distance from the  
251 substrate and *tau* values for the head-contact vs. feet-contact flies, we used a non-parametric  
252 (Wilcoxon rank sum) test to compare the various quantities (Fig. 3 E-F; Fig. 4 C-D). All  
253 statistical comparisons were performed using MATLAB.

254

## 255 **RESULTS**

### 256 **Initiation of deceleration and leg-extension before a vertical landing**

257 The landing behaviors for landing on vertical surfaces consist of two components -  
258 deceleration of the body and extension of legs - that occur immediately prior to landing. Of  
259 the 18 vertical landing trials, we observed a phase of deceleration before touchdown in 13  
260 trials (Fig. 2A). In the remaining 5 trials (Fig. 2B), the flies did not decelerate but we  
261 observed leg extension (See Materials and methods). For all cases in which there was a clear  
262 deceleration phase, there was a strong linear relationship between displacement and  
263 perpendicular velocity at the onset of deceleration (coefficient of determination ( $R^2$ ) = 0.71;  
264 Fig. 2C). Such flies typically approached the vertical wall at velocities ranging between 0.1-  
265 0.55 m/s. These observations support the constant-*tau* hypothesis for onset of deceleration. In  
266 contrast, the correlation between displacement and perpendicular velocity at the onset of leg-  
267 extension is weaker ( $R^2$  = 0.17; Fig. 2D), suggesting that leg-extension in landing flies is not  
268 initiated at a threshold value of *tau*.

### 269 **Initiation of deceleration and leg-extension before an inverted landing**

270 Of the 32 flies which landed on the ceiling, 25 flies decelerated before touchdown (Fig. 2E).  
271 In the remaining 7 trials, the flies did not decelerate before touchdown (Fig. 2F) (see  
272 Materials and methods). However, they extended their legs. Similar to vertical landings, these  
273 flies also typically approached the ceiling at velocities less than 0.4 m/s. For the flies that  
274 decelerated, there was only a weak linear relationship between displacement and  
275 perpendicular velocity at the onset of deceleration ( $R^2$  = 0.079; Fig. 2G) and at the onset of  
276 leg-extension ( $R^2$  = 0.036; Fig. 2H). These results indicate that for inverted landings, neither  
277 deceleration nor leg-extension were initiated at threshold values of *tau*.

278 The inverted landing trials could be grouped into two categories. In 15 trials, the flies  
279 bump their head on the landing surface before eventually landing on it, whereas in the

280 remaining 17 trials, the head did not touch the landing surface during the course of the  
281 landing maneuver (Fig. 3A). We make the assumption that in the former scenario, which we  
282 refer to as *head-contact landing*, flies were unable to land in a controlled fashion, and that the  
283 head-on collisions with the landing surface are symptomatic of a lack of control. In the latter  
284 scenario, which we call *feet-contact landing*, the flies were able to land with their feet on the  
285 surface, and hence we assume that they were in control of their landing maneuver. Flies that  
286 landed head-contact into the inverted surface typically approached it with larger  
287 perpendicular velocities (blue lines, Fig. 3B) than the flies that landed feet-contact (red lines,  
288 Fig 3B).

289 Out of the 25 flies which decelerated before touchdown (Fig. 2E), 12 performed a  
290 feet-contact landing and 13 performed a head-contact landing. The flies that performed  
291 inverted feet-contact landings, showed a strong linear relationship between distance from the  
292 substrate and perpendicular velocity at the onset of deceleration ( $n=12$ ;  $R^2= 0.69$ ; Fig. 3C),  
293 implying that these flies initiated deceleration at a fixed value of  $\tau$ . In flies that landed  
294 head-contact, on the other hand, the relationship between the distance from the substrate at  
295 which deceleration was initiated vs. perpendicular velocity was weak ( $R^2= 0.12$ ; Fig. 3D),  
296 suggesting that if a fly does not decelerate at or before the threshold value of  $\tau$ , it is unable  
297 to land in a controlled manner. Thus, as shown above, flies initiated deceleration at a constant  
298  $\tau$  before vertical landing, or when landing feet-contact on the inverted surface (Fig. 2C;  
299 3C). However, the correlation between distance from object and perpendicular velocity at the  
300 onset of leg-extension was weak, regardless of the type of landing (vertical landing; Fig. 2D;  
301 inverted landing; Fig 2H). These results indicate that the deceleration module is elicited  
302 independently of the leg-extension module, and perhaps by a different set of cues.

303 Is there a relationship between the approach kinematics and control of landing?  
304 Although the distance from the substrate at which deceleration was initiated was similar for  
305 flies that landed feet-contact vs. head-contact (Wilcoxon ranksum test,  $p>0.05$ ; Fig 3E), there  
306 was significant difference in their  $\tau$  values (Wilcoxon ranksum test,  $p<0.01$ ; Fig 3F). The  
307 positive linear relationship for feet-contact landing between distance and perpendicular  
308 velocity at the onset of deceleration (constancy of  $\tau$ ), and larger values of  $\tau$  at the onset of  
309 deceleration of feet-contact as opposed to head-contact suggests that an optimal  $\tau$  margin of  
310  $41 \pm 9$  ms ( $\mu \pm \sigma$ ) was required for initiating deceleration in a properly controlled maneuver.  
311 Flies that missed this window were likely to bump their heads against the inverted landing  
312 surface. Both the flies that performed feet-contact landings and the ones that landed head-

313 contact, decelerated at rates that do not differ significantly (Wilcoxon Ranksum Test,  $p > 0.05$ ;  
314 Fig. S1B), suggesting that flies did not compensate for missing the *tau* margin by increasing  
315 average deceleration.

316 Of the 22 inverted landing trials where the flies initiated leg-extension during flight  
317 (and not during take-off, see Materials and methods), 14 executed a feet-contact landing and  
318 8 executed a head-contact inverted landing. The relationship between distance from the  
319 substrate and perpendicular velocity at the time of onset of leg-extension was very weak for  
320 both feet-contact landing ( $n=14$ ;  $R^2 = 0.020$ ; Fig. 4A) and for head-contact landing ( $n=8$ ;  $R^2 =$   
321  $0.17$ ; Fig. 4B). This implies that flies landing feet-contact on inverted surfaces did not initiate  
322 leg extension at a constant *tau*. These flies did not significantly differ in the distance from the  
323 landing surface at which they began leg-extension (Wilcoxon ranksum test,  $p > 0.05$ ; Fig. 4C),  
324 but they began leg-extension at significantly lower values of *tau* as compared to the flies that  
325 landed feet-contact (Wilcoxon ranksum test,  $p < 0.05$ ; Fig 4D). This also shows that longer *tau*  
326 is essential for landing in a controlled manner.

### 327 **Dependence of the initiation of deceleration on the orientation of the landing surface**

328 We next plotted the distance from substrate against perpendicular velocity at the onset of  
329 deceleration for both vertical landings (orange) and inverted landings (black; Fig. 5A), and  
330 obtained a weak correlation between the two quantities ( $R^2 = 0.14$ ). These trials however  
331 included those flies that landed head-contact. Excluding trials in which the fly landed head-  
332 contact, we obtain a stronger correlation between distance from substrate and perpendicular  
333 velocity at the onset of deceleration ( $R^2 = 0.74$ ). This implies that flies that land feet-contact  
334 initiate deceleration at the same *tau* before touchdown on both vertical or inverted surfaces  
335 (Fig. 5B) and hence the neuronal and mechanistic basis of onset of deceleration may be the  
336 same in both cases, regardless of the orientation of the surface.

337 Because there is consistency in the onset of deceleration between vertical and inverted  
338 feet-contact landings, we wanted to test if a similar stereotypy could be observed in the rate  
339 of deceleration. Of all flies that land feet-first on the substrate, those approaching the vertical  
340 surface decelerate at lower rates compared to flies approaching the inverted surface  
341 (Wilcoxon ranksum test,  $p < 0.01$ ; Fig. 5C). Thus, the rate of deceleration appears to be  
342 context dependent.

### 343 **Correlation between deceleration and leg-extension**

344 As demonstrated in the previous sections, flies initiated deceleration at a constant  $\tau$  before  
345 landing on the vertical surface or smoothly on the upside down surface (Fig. 2C; 3C).  
346 However, the correlation between displacement and perpendicular velocity at the onset of  
347 leg-extension was weak, regardless of the type of landing (Fig. 2D, H; 4A,B). These results  
348 indicate that each module is released by different cues. The subset of trials in which the flies  
349 decelerated before touchdown, and in which we could ascertain that leg-extension occurred  
350 when flying towards the landing substrate (see Materials and methods), was 9 out of 18  
351 vertical landings, and 9 out of 17 feet-contact landings. Consistency in both the order of  
352 initiation of the two modules, and the time difference between the onsets, would support the  
353 hypothesis that both modules are initiated by the same set of stimuli. Flies initiated leg-  
354 extension *before* deceleration in 7 out of 9 vertical landings (Fig. 5D), and in 4 out of 9  
355 inverted landings (Fig. 5E). Additionally, the correlation between time to collision to the  
356 landing surface at the onset of leg-extension and the time to collision to the landing surface at  
357 the onset of deceleration was weak for both vertical landings ( $R^2 = 0.20$ ; Fig. 5F), and feet-  
358 contact landings ( $R^2 = 0.26$ ; Fig. 5G). Therefore, it seems unlikely that the same sensory cues  
359 elicit both deceleration and leg-extension.

360

361

## DISCUSSION

362 We filmed houseflies *Musca domestica* landing on a vertical surface (vertical landing) and on  
363 the underside of a horizontal surface (inverted landing). Houseflies approaching the vertical  
364 surface initiated deceleration at a displacement proportional to the component of flight  
365 velocity perpendicular to the landing surface i.e. at a fixed  $\tau$  (Fig. 2C). In nearly half of the  
366 flies in the inverted landing assay, there was head-contact while landing (head-contact; see  
367 Supplementary videos) whereas the rest touched their tarsi on the surface first before  
368 swiveling around and landing (feet-contact) but not their heads. In the case of feet-contact,  
369 deceleration was also initiated at a threshold value of  $\tau$  (Fig. 3C). This threshold magnitude  
370 of  $\tau$  was similar to the magnitude used by flies while initiating deceleration before  
371 touchdown on the vertical surface (Fig. 5B). The correlation between displacement and  
372 perpendicular velocity at the onset of leg-extension was weak regardless of the landing  
373 surface (vertical or inverted; Fig. 2D, H), or the type of landing (feet-contact or head-contact)  
374 (Fig 2H; 4A, B). Flies that performed a head-contact during inverted landings typically  
375 approached the landing surface at higher perpendicular velocities (Fig. 3B). Additionally,

376 they triggered both deceleration (Fig 3F) and leg-extension (Fig. 4D) at lower values of  $\tau$   
377 compared to the flies that landed smoothly.

### 378 **Computation of $\tau$ by flies**

379 It has been demonstrated in a previous study that houseflies approaching a sphere initiate  
380 deceleration at a threshold value of  $\tau$  (Wagner, 1982). A fly landing on a sphere can  
381 potentially contact the surface at any inclination ranging from horizontal to upside down,  
382 depending on the orientation of the landing spot which was not recorded in the study. In the  
383 current study, we have shown that houseflies initiate deceleration at a fixed value of  $\tau$   
384 regardless of whether they land on a vertical surface, or feet-first on an inverted surface.  
385 Visual inspection of our videos of vertical landings reveal that the final moments of the  
386 vertical landing maneuver are highly stereotyped: flies always pitch up before contacting with  
387 the landing surface (see Supplementary videos). The horizontal velocities of houseflies  
388 (Wagner, 1986) and *Drosophila melanogaster* (David, 1978) are known to be inversely  
389 correlated with the pitch angle. Therefore, it is likely that flies approaching the vertical  
390 surface induce deceleration by increasing their body pitch. However, flies performed inverted  
391 landings in a much more variable manner. Such landings involved pitch-up maneuvers prior  
392 to landing in some cases, but a combination of roll, pitch and yaw maneuvers before landing  
393 in other cases (see Supplementary videos). Despite the variability in the final moments of  
394 inverted landings, flies that performed feet-contact inverted landings initiated deceleration at  
395 a constant value of  $\tau$ . Moreover, the magnitude of  $\tau$  at the onset of deceleration was also  
396 similar for both vertical and inverted landings. Together, these results indicate that flies likely  
397 follow the same rules to initiate deceleration before touchdown on any kind of object. A  
398 retinal size-dependent threshold model was proposed to explain the initiation of deceleration  
399 in *Drosophila melanogaster* approaching a cylindrical surface (van Breugel and Dickinson,  
400 2012). However, the results of the study were experimentally indistinguishable from the  
401 constant  $\tau$  model. These results imply that flies can estimate  $\tau$  from optic flow, and  
402 initiate deceleration when the value of  $\tau$  falls below a threshold.

403         The current study adds to the growing body of evidence that nervous systems of  
404 animals can compute  $\tau$  and use it to control multiple behaviors. For example, birds  
405 approaching a target appear to maintain the rate of change of  $\tau$  with time ( $\tau\dot{\tau}$ ) at a  
406 constant value, resulting in a characteristic deceleration profile (Lee et al., 1991; Lee et al.,  
407 1993). Pigeons approaching a perch begin leg-extension at a fixed value of  $\tau$  (Lee et al.,

408 1993). Gannets plunge diving into the sea begin streamlining when the value of  $\tau$  reduces  
409 below a threshold (Lee and Reddish, 1981). Bees approaching a surface maintain  $\tau$  at a  
410 constant value, resulting in a proportionate decrease in flight velocity with distance (Baird et  
411 al., 2013; Srinivasan et al., 2000).

412 How might flies estimate  $\tau$  from optic flow? When an animal approaches a surface,  
413 the instantaneous value of  $\tau$  is approximately equal to the ratio of the angular separation  
414 between two points on the surface to the rate of change of angular separation between these  
415 two points (provided the points are close in space; Lee, 1976). Thus to estimate  $\tau$ , the  
416 nervous system should be able to compute angular size, and rate of angular expansion of  
417 objects. Additionally, it must be capable of comparing these two quantities in real time.  
418 Despite numerous behavioral examples of  $\tau$  estimation in animals, studies demonstrating  
419 neural computation of  $\tau$  are scarce. To the best of our knowledge, the only known example  
420 of computation of a threshold value of  $\tau$  by a neuron is in pigeons (Sun and Frost, 1998;  
421 Wang and Frost, 1992), which showed that the response onset and peak firing to a looming  
422 object of a sub-population of neurons in the nucleus rotundus occurred at a fixed  $\tau$ ,  
423 irrespective of the angular size or velocity of the object.

424 Measurement of  $\tau$  can be achieved by comparing the rate of expansion and angular  
425 size of a moving stimulus. Are there examples of neurons or neuronal clusters which measure  
426 either of these quantities in insects? A recent study in bees revealed descending neurons in  
427 the ventral nerve cord monotonically increased their median firing rate with the angular  
428 velocity of a frontally presented rotating spiral stimulus, up to a specific angular velocity  
429 value beyond which the response saturated. However, the median response of the neurons  
430 was also a function of the number of arms in the rotating spiral (which correlates with spatial  
431 frequency) (Ibbotson et al., 2017). In flies, the lobula plate tangential cells integrate inputs  
432 from local motion detectors and respond to wide-field motion (for a detailed review see Borst  
433 et al., 2010). A subset of lobula plate tangential cells called horizontal system (HS) cells  
434 respond to optic flow in the horizontal direction (Hausen, 1982). The response of the HS cells  
435 to moving gratings depends on the contrast, wavelength, and velocity of the grating (Egelhaaf  
436 and Borst, 1989). However, the HS cells of a hoverfly species presented with moving  
437 naturalistic images, reliably encoded angular velocity of the images with little dependence on  
438 the contrast of the images (Straw et al., 2008). Examples of neurons which measure the  
439 angular size of a looming object are seen in animals as diverse as bullfrogs (Nakagawa and  
440 Hongjian, 2010), pigeons (Sun and Frost, 1998) and locusts (Gabbiani et al., 1999; Gabbiani

441 et al., 2001). It is thus likely that there may also exist neurons which estimate angular size  
442 and angular expansion in the visual neuropil of houseflies. So far, no study has demonstrated  
443 neurons which compute the ratio of angular size to angular expansion in insects. A vast  
444 majority of the studies of neuronal response to visual stimuli document the firing properties  
445 of neurons in the brain or the ventral nerve cord. It is possible that angular expansion and  
446 angular size are compared by interneurons in the thoracic ganglia. Studies involving  
447 simultaneous presentation of looming stimuli and single unit recordings from the thoracic  
448 ganglia are required to test this hypothesis.

449 A recent study demonstrated that *Drosophila melanogaster* decelerate to a near hover  
450 state, followed by acceleration until touchdown on a vertical pole (Shen and Sun, 2017).  
451 However, in our study, houseflies decelerated continuously till touchdown in most trials (Fig.  
452 2A, E). Thus, it is likely that there is considerable variation in the visual control of  
453 deceleration among flying insects. As mentioned above, houseflies approaching the vertical  
454 surface primarily undergo a pitch up maneuver before touchdown. Flies approaching the  
455 inverted surface can rotate about all three axes. The biomechanical processes of the landing  
456 maneuvers are likely to contribute significantly to the deceleration profile before touchdown,  
457 and should be studied in greater detail.

#### 458 **Variability and versatility of the landing response**

459 15 out of the 32 flies landing on the inverted surface contacted the substrate with their  
460 head. Such flies typically approached the ceiling with higher velocity (Fig. 3B), and initiated  
461 deceleration and leg-extension at lower values of  $\tau$  (Fig. 3 F;4 D). This was not observed in  
462 flies landing on the vertical surface. Can the differences in experimental setups and  
463 procedures for filming vertical and inverted landings (see Materials and methods) explain this  
464 observation? For the inverted landing experiments, we illuminated the flight chamber to  
465 match the illuminance of sunlight (~30000 lux). The two halogen lamps used for the purpose  
466 did generate considerable heat. Although we turned the halogen lamps on for a maximum of  
467 3 minutes during each trial, we cannot completely rule out the possibility of heat stress  
468 affecting the landing behavior.

469 Crashes into the landing surface have also been documented in previous papers. For  
470 instance, around 36% of *Drosophila melanogaster* approaching a cylindrical landing post  
471 crashed into it (van Breugel and Dickinson, 2012). In their experiments, the sub-population  
472 that crashed did not differ from the landing flies in the retinal size dependent threshold



473 velocity at which they began deceleration. Instead, these flies decelerated at a lower rate,  
474 often failing to extend their legs before touchdown. In the current study, we did not find  
475 significant differences in the rate of deceleration between feet-contact vs. head-contact  
476 landing flies (Wilcoxon ranksum test,  $p > 0.05$ ; Fig. S1B). Also, the head-contact landing flies  
477 extended their legs before touchdown, and did not initiate deceleration at a distance  
478 proportional to velocity (Fig. 3D). We filmed a single inverted landing from a batch of 4-6  
479 flies. Therefore, we cannot ascertain from our data whether there exists a sub-population of  
480 flies are poor at performing inverted landings. It would be interesting to test if the same flies  
481 repeatedly bump their heads on the landing surface.

482         5 out of the 18 flies landing on the vertical surface, and 7 out of 32 flies landing on  
483 the inverted surface, did not decelerate before touchdown. It is possible that these flies did  
484 not experience sufficiently low values of  $\tau$  to initiate the deceleration response. However,  
485 we do not have sufficient number of non-decelerating trials to explicitly test this hypothesis.

486         For both vertical and inverted landings, flies initiated leg-extension at a point that  
487 appears to be independent of distance from the landing substrate, and perpendicular velocity.  
488 In 10 out of the 32 inverted landings, the fly initiated leg-extension during takeoff. This  
489 implies that either leg-extension is not tightly regulated, or is extremely sensitive to finer cues  
490 such as contrast, texture, local light intensities, etc. Indeed, tethered flies initiate leg-  
491 extension in response to front-to-back optic flow (Borst, 1986; Borst, 1989; Borst and Bahde,  
492 1986; Borst and Bahde, 1987; Borst and Bahde, 1988b), and the leg-extension response is a  
493 function of the size, velocity, and contrast of an object approaching the fly (Borst and Bahde,  
494 1988a; Goodman, 1960). Furthermore, a sudden change in light intensity can lead to leg-  
495 extension in tethered flies (Borst, 1986; Goodman, 1960). We are uncertain about the cues  
496 that led to the initiation of leg-extension. More studies are required on the leg-extension  
497 response in free flight, in which the landing object and the surrounding visual environment  
498 are under finer control.

499

## CONCLUSION

500 We aimed to understand the rules used by houseflies to initiate two components of the  
501 landing maneuver: deceleration, and leg-extension. About half the flies approaching an  
502 inverted surface made head-contact before landing. The remaining flies initiated deceleration  
503 at a displacement proportional to the component of approach velocity normal to the landing  
504 surface. This proportionality constant ( $\tau$ ) remained independent of the orientation of the



505 landing surface (vertical or upside down). If a fly missed this *tau* window, it usually  
506 contacted its head with the landing surface. The initiation of leg-extension appears to be  
507 independent of approach velocity and displacement from the landing surface, indicating that  
508 the leg-extension response is either not tightly controlled, or is sensitive to finer cues such as  
509 local light intensity changes, body posture, etc.

#### 510 **ACKNOWLEDGEMENTS**

511 We thank Dinesh Natesan for providing us some of the codes to compute flight variables and  
512 Sujeeth Parthiban for his help with the experiments involving vertical landing. We thank all  
513 members of the Insect Flight lab for their invaluable inputs on the experimental procedure  
514 and data analysis.

#### 515 **COMPETING INTERESTS**

516 The authors declare no competing financial interests.

#### 517 **FUNDING:**

518 Funding for this study was provided by grants from the Air Force Office of Scientific  
519 Research (AFOSR) # FA2386-11-1-4057 and # FA9550-16-1-0155, and the National Centre  
520 for Biological Sciences (Tata Institute of Fundamental Research) to SPS.

521

#### 522 **FIGURE LEGENDS**

523 **Fig. 1. Experimental setups to record vertical and inverted landings, and measurement**  
524 **of the associated flight variables.** (A) The experimental setup for filming vertical landings  
525 which were elicited on a prism-shaped object and recorded by two synchronized high-speed  
526 cameras at 3000 fps. (B) Experimental setup for filming inverted landings which occurred on  
527 a translucent ceiling and recorded by three synchronized high-speed cameras at 4000 fps. For  
528 both vertical landings (Ai) and inverted landings (Bi), we digitized the tips of the head and  
529 abdomen of the fly in each frame, in addition to three points on the landing surface. We  
530 computed the midpoint of the line joining the head and abdomen tips, and the distance of the  
531 midpoint from the landing surface ( $d$ ). The component of flight velocity perpendicular to the  
532 plane of the landing surface ( $v$ ) was computed according to Equation 1. (C-D) Sample raw  
533 trajectories of the midpoint of a fly performing a vertical (C) and inverted landing (D). (E-F)  
534 Below each trajectory, the distance from the substrate (blue trace) and perpendicular velocity

535 (orange trace) are plotted as functions of time to collision to the landing surface. The flies  
536 contacted the landing surface at 0 ms.

537 **Fig. 2. Initiation of deceleration and leg-extension during vertical and inverted landings.**

538 (A) Perpendicular velocity versus time to collision for all vertical landing trials in which the  
539 fly decelerated before touchdown on the vertical surface (n=13). The flies contacted the  
540 landing surface at 0 ms. The red squares mark the onset of deceleration as identified by our  
541 code (see Materials and methods). The blue sections of the traces represent the decelerating  
542 segments of the flight trajectory. (B) Perpendicular velocity versus time to collision for the  
543 vertical landing trials in which the fly did not decelerate before touchdown (n=5). (C)  
544 Distance from substrate versus perpendicular velocity at the time of onset of deceleration for  
545 the 13 vertical landing trials. The coefficient of determination ( $R^2$ ) of the best fit line is 0.71.  
546 (D) Distance from substrate versus perpendicular velocity at the onset of leg-extension for the  
547 12 vertical landings whose frame of onset of leg-extension could be identified (see Materials  
548 and methods).  $R^2$  of the best fit line is 0.17. (E) Perpendicular velocity versus time for all  
549 inverted landing trials in which the fly decelerated before touchdown on the upside down  
550 surface (n=25). (F) Perpendicular velocity versus time for the inverted landing trials in which  
551 the fly did not decelerate before touchdown (n=7). (G) Distance from substrate versus  
552 perpendicular velocity at the onset of deceleration for 25 inverted landing trials.  $R^2$  of the best  
553 fit line is 0.079. (H) Distance from substrate versus perpendicular velocity at the onset of leg-  
554 extension for the 22 inverted landing trials in which the flies extended their legs while  
555 approaching the landing surface (and not during take-off, see Materials and methods).  $R^2$  of  
556 the best fit line is 0.036.

557 **Fig. 3. Initiation of deceleration for flies performing feet-contact and head-contact**

558 **inverted landings.** (A) A closer look at the videos of inverted landings revealed that the trials  
559 can be grouped into two categories. In 15 trials, the head made contact with the landing  
560 surface (“Head-contact landings”, blue) whereas in the remaining 17 trials, the head did not  
561 touch the landing surface during the course of the landing maneuver (“feet-contact landings”,  
562 red) (B) Perpendicular velocity versus time to collision for all trials (n=32) (C-D) Only 25 out  
563 of the 32 flies decelerated before landing (see Materials and methods), and analyzed further.  
564 Of these 25 inverted landing trials, 12 flies performed a feet-contact landing and 13 flies  
565 executed a head-contact landing. (C) Distance from substrate versus perpendicular velocity at  
566 the time of onset of deceleration for inverted feet-contact landing trials (n=12,  $R^2 = 0.69$ ). (D)  
567 Distance from substrate versus perpendicular velocity at the time of onset of deceleration for

568 inverted head-contact landing trials ( $n=13$ ,  $R^2 = 0.12$ ). (E-F) Box plots for (E) distance from  
569 substrate, and (F)  $\tau$ , at the onset of deceleration for feet-contact and head-contact landings.  
570 The grey boxes indicate the central 50% data around the median (red line). The whiskers  
571 represent 1.5 times the interquartile range. Outliers were included in the analysis. Asterisks  
572 represent statistically different comparisons (\*, \*\*, \*\*\*, and \*\*\*\* represent  $p<0.05$ ,  $p<0.01$ ,  
573  $p<0.001$ ,  $p<0.0001$  respectively). This convention for boxplots and statistical significance is  
574 employed for all subsequent figures.

575 **Fig. 4. Initiation of leg-extension for flies performing feet-contact and head-contact**  
576 **inverted landings.** Of the 22 flies which extended their legs when flying towards the upside  
577 down landing platform (see Materials and methods), 14 flies executed a feet-contact and 8  
578 executed a head-contact landing. (A) Distance from substrate versus perpendicular velocity at  
579 the time of onset of leg-extension for feet-contact landing trials ( $n=14$ ;  $R^2 = 0.020$ ). (B)  
580 Distance from substrate versus perpendicular velocity at the onset of leg-extension for head-  
581 contact inverted landing trials ( $n=8$ ,  $R^2 = 0.17$ ). (C-D) Box plots for (C) distance from  
582 substrate, and (D)  $\tau$ , at the onset of leg-extension for feet-contact and head-contact  
583 landings.

584 **Fig. 5. Comparing the onset of deceleration of vertical and inverted landings, and**  
585 **testing for correlation between the onsets of deceleration and leg-extension.** (A) Distance  
586 from substrate versus perpendicular velocity at the onset of deceleration for vertical (orange  
587 squares,  $n=13$ ) and inverted landings (black squares,  $n=25$ ,  $R^2 = 0.14$ ). (B) Distance from  
588 substrate versus perpendicular velocity at the time of onset of deceleration for vertical ( $n=13$ )  
589 and feet-contact inverted ( $n=12$ ) landings ( $R^2 = 0.74$ ). (C) The flies landing feet-contact on  
590 the upside down surface decelerated at significantly higher rates compared to flies landing on  
591 the vertical surface (Wilcoxon ranksum test,  $p<0.01$ ). (D, E) Perpendicular velocity as a  
592 function of time for all trials ( $n=9$ ) in which the onsets of deceleration (red squares) and leg-  
593 extension (blue circles) were known (see text for details), for (D) vertical landings and (E)  
594 feet-contact inverted landings. (F, G) Time to collision at the onset of leg-extension plotted as  
595 a function of time to collision at the onset of deceleration, for (F) all 9 vertical landing trials  
596 depicted in (D), and (G) all 9 feet-contact landing trials depicted in (E). The low values of  $R^2$   
597 of best-fit lines show a weak correlation between the quantities on the x and y axes.

598

599

## SUPPLEMENTARY FIGURE LEGENDS

600 **Fig. S1A. Rotation frequency.** We visually estimated the durations of all body rotations in  
601 10 randomly selected videos each of vertical landings and inverted landings. The inverse of  
602 the time duration of each rotation is the frequency for the given body rotation.

603 **Fig. S1B. Comparison of average deceleration between feet-contact and head-contact**  
604 **inverted landings.** Before touchdown, there was no significant difference (Wilcoxon  
605 ranksum test,  $p > 0.05$ ) in the rate of deceleration between feet-contact landings and head-  
606 contact landings.

#### 607 SUPPLEMENTARY VIDEO LEGENDS

608 **Supplementary Movie 1.** A vertical landing.

609 **Supplementary Movie 2.** A feet-contact landing.

610 **Supplementary Movie 3.** A fly bumping onto the ceiling.

611 **Supplementary Movie 4.** An inverted landing in which the fly pitched up to contact the  
612 ceiling.

613 **Supplementary Movie 5.** An inverted landing in which the fly rolled to contact the ceiling.

614 **Supplementary Movie 6.** An inverted landing in which the fly rotated about the yaw, pitch  
615 and roll axes before touchdown on the ceiling.

#### 616 REFERENCES

617 **Baird, E., Boeddeker, N., Ibbotson, M. R. and Srinivasan, M. V.** (2013). A universal  
618 strategy for visually guided landing. *Proc. Natl. Acad. Sci.* **110**, 18686–18691.

619 **Borst, A.** (1986). Time course of the houseflies' landing response. *Biol. Cybern.* **54**, 379–  
620 383.

621 **Borst, A.** (1989). Temporal processing of excitatory and inhibitory motion stimuli in the fly's  
622 landing system. *Sci. Nat.* **76**, 531–534.

623 **Borst, A.** (1990). How Do Flies Land? *BioScience* **40**, 292–299.

624 **Borst, A. and Bahde, S.** (1986). What kind of movement detector is triggering the landing  
625 response of the housefly? *Biol. Cybern.* **55**, 59–69.

626 **Borst, A. and Bahde, S.** (1987). Comparison between the movement detection systems  
627 underlying the optomotor and the landing response in the housefly. *Biol. Cybern.* **56**, 217–  
628 224.

629 **Borst, A. and Bahde, S.** (1988a). Spatio-temporal integration of motion.

- 630 *Naturwissenschaften* **75**, 265–267.
- 631 **Borst, A. and Bahde, S.** (1988b). Visual information processing in the fly's landing system.  
632 *J. Comp. Physiol. A* **163**, 167–173.
- 633 **Borst, A., Haag, J. and Reiff, D. F.** (2010). Fly Motion Vision. *Annu. Rev. Neurosci.* **33**,  
634 49–70.
- 635 **Cogshall, J. C.** (1972). The landing response and visual processing in the milkweed bug,  
636 *Oncopeltus fasciatus*. *J. Exp. Biol.* **57**, 401–413.
- 637 **David, C. T.** (1978). The relationship between body angle and flight speed in free-flying  
638 *Drosophila*. *Physiol. Entomol.* **3**, 191–195.
- 639 **De Talens, A. F. P. and Ferreti, C. T.** (1970). Landing reaction of *Musca domestica*:  
640 dependence on dimensions and position of the stimulus. *J. Exp. Biol.* **52**, 233–256.
- 641 **Eckert, H.** (1980). Orientation sensitivity of the visual movement detection system activating  
642 the landing response of the blowflies, *Calliphora*, and *Phaenicia*: A behavioural investigation.  
643 *Biol. Cybern.* **37**, 235–247.
- 644 **Egelhaaf, M. and Borst, A.** (1989). Transient and steady-state response properties of  
645 movement detectors. *JOSA A* **6**, 116–127.
- 646 **Evangelista, C., Kraft, P., Dacke, M., Reinhard, J. and Srinivasan, M. V.** (2010). The  
647 moment before touchdown: landing manoeuvres of the honeybee *Apis mellifera*. *J. Exp. Biol.*  
648 **213**, 262–270.
- 649 **Gabbiani, F., Krapp, H. G. and Laurent, G.** (1999). Computation of object approach by a  
650 wide-field, motion-sensitive neuron. *J. Neurosci.* **19**, 1122–1141.
- 651 **Gabbiani, F., Mo, C. and Laurent, G.** (2001). Invariance of angular threshold computation  
652 in a wide-field looming-sensitive neuron. *J. Neurosci.* **21**, 314–329.
- 653 **Goodman, L. J.** (1960). The landing responses of insects. *J. Exp. Biol.* **37**, 854–878.
- 654 **Hausen, K.** (1982). Motion sensitive interneurons in the optomotor system of the fly. *Biol.*  
655 *Cybern.* **45**, 143–156.
- 656 **Hedrick, T. L.** (2008). Software techniques for two- and three-dimensional kinematic  
657 measurements of biological and biomimetic systems. *Bioinspir. Biomim.* **3**, 034001.
- 658 **Hyzer, W. G.** (1962). Flight behavior of a fly alighting on a ceiling. *Science* **137**, 609–610.
- 659 **Ibbotson, M. R., Hung, Y.-S., Meffin, H., Boeddeker, N. and Srinivasan, M. V.** (2017).  
660 Neural basis of forward flight control and landing in honeybees. *Sci. Rep.* **7**,.
- 661 **Lee, D. N.** (1976). A Theory of Visual Control of Braking Based on Information about Time-  
662 to-Collision. *Perception* **5**, 437–459.
- 663 **Lee, D. N.** (1980). The Optic Flow Field: The Foundation of Vision [and Discussion]. *Philos.*

- 664 *Trans. R. Soc. B Biol. Sci.* **290**, 169–179.
- 665 **Lee, D. N. and Reddish, P. E.** (1981). Plummeting gannets: a paradigm of ecological optics.  
666 *Nature* **293**, 293.
- 667 **Lee, D. N., Reddish, P. E. and Rand, D. T.** (1991). Aerial docking by hummingbirds.  
668 *Naturwissenschaften* **78**, 526–527.
- 669 **Lee, D. N., Davies, M. N., Green, P. R. and others** (1993). Visual control of velocity of  
670 approach by pigeons when landing. *J. Exp. Biol.* **180**, 85–104.
- 671 **Nakagawa, H. and Hongjian, K.** (2010). Collision-Sensitive Neurons in the Optic Tectum  
672 of the Bullfrog, *Rana catesbeiana*. *J. Neurophysiol.* **104**, 2487–2499.
- 673 **Reber, T., Baird, E. and Dacke, M.** (2016a). The final moments of landing in bumblebees,  
674 *Bombus terrestris*. *J. Comp. Physiol. A* **202**, 277–285.
- 675 **Reber, T., Dacke, M., Warrant, E. and Baird, E.** (2016b). Bumblebees Perform Well-  
676 Controlled Landings in Dim Light. *Front. Behav. Neurosci.* **10**,.
- 677 **Shen, C. and Sun, M.** (2017). Wing and body kinematics measurement and force analyses of  
678 landing in fruit flies. *Bioinspir. Biomim.* **13**, 016004.
- 679 **Srinivasan, M. V., Zhang, S. W., Chahl, J. S., Barth, E. and Venkatesh, S.** (2000). How  
680 honeybees make grazing landings on flat surfaces. *Biol. Cybern.* **83**, 171–183.
- 681 **Straw, A. D., Rainsford, T. and O’Carroll, D. C.** (2008). Contrast sensitivity of insect  
682 motion detectors to natural images. *J. Vis.* **8**, 32.
- 683 **Sun, H. and Frost, B. J.** (1998). Computation of different optical variables of looming  
684 objects in pigeon nucleus rotundus neurons. *Nat Neurosci* **1**, 296–303.
- 685 **Tammero, L. F. and Dickinson, M. H.** (2002). Collision-avoidance and landing responses  
686 are mediated by separate pathways in the fruit fly, *Drosophila melanogaster*. *J. Exp. Biol.*  
687 **205**, 2785–2798.
- 688 **van Breugel, F. and Dickinson, M. H.** (2012). The visual control of landing and obstacle  
689 avoidance in the fruit fly *Drosophila melanogaster*. *J. Exp. Biol.* **215**, 1783–1798.
- 690 **Wagner, H.** (1982). Flow-field variables trigger landing in flies. *Nature*.
- 691 **Wagner, H.** (1986). Flight performance and visual control of flight of the free-flying  
692 housefly (*Musca domestica* L.) I. Organization of the flight motor. *Phil Trans R Soc Lond B*  
693 **312**, 527–551.
- 694 **Walker, J. A.** (1998). Estimating velocities and accelerations of animal locomotion: a  
695 simulation experiment comparing numerical differentiation algorithms. *J. Exp. Biol.* **201**,  
696 981–995.
- 697 **Wang, Y. and Frost, B. J.** (1992). Time to collision is signalled by neurons in the nucleus

698 rotundus of pigeons. *Nature* **356**, 236–238.

699 **Zhao, J., Huang, H. and Yan, S.** (2017). Honey bees ( *Apis mellifera ligustica* ) swing

700 abdomen to dissipate residual flying energy landing on a wall. *J. Appl. Phys.* **121**, 094702.

701

bioRxiv preprint doi: <https://doi.org/10.1101/448472>; this version posted October 20, 2018. The copyright holder for this preprint (which was not certified by peer review) is the author/funder. All rights reserved. No reuse allowed without permission.

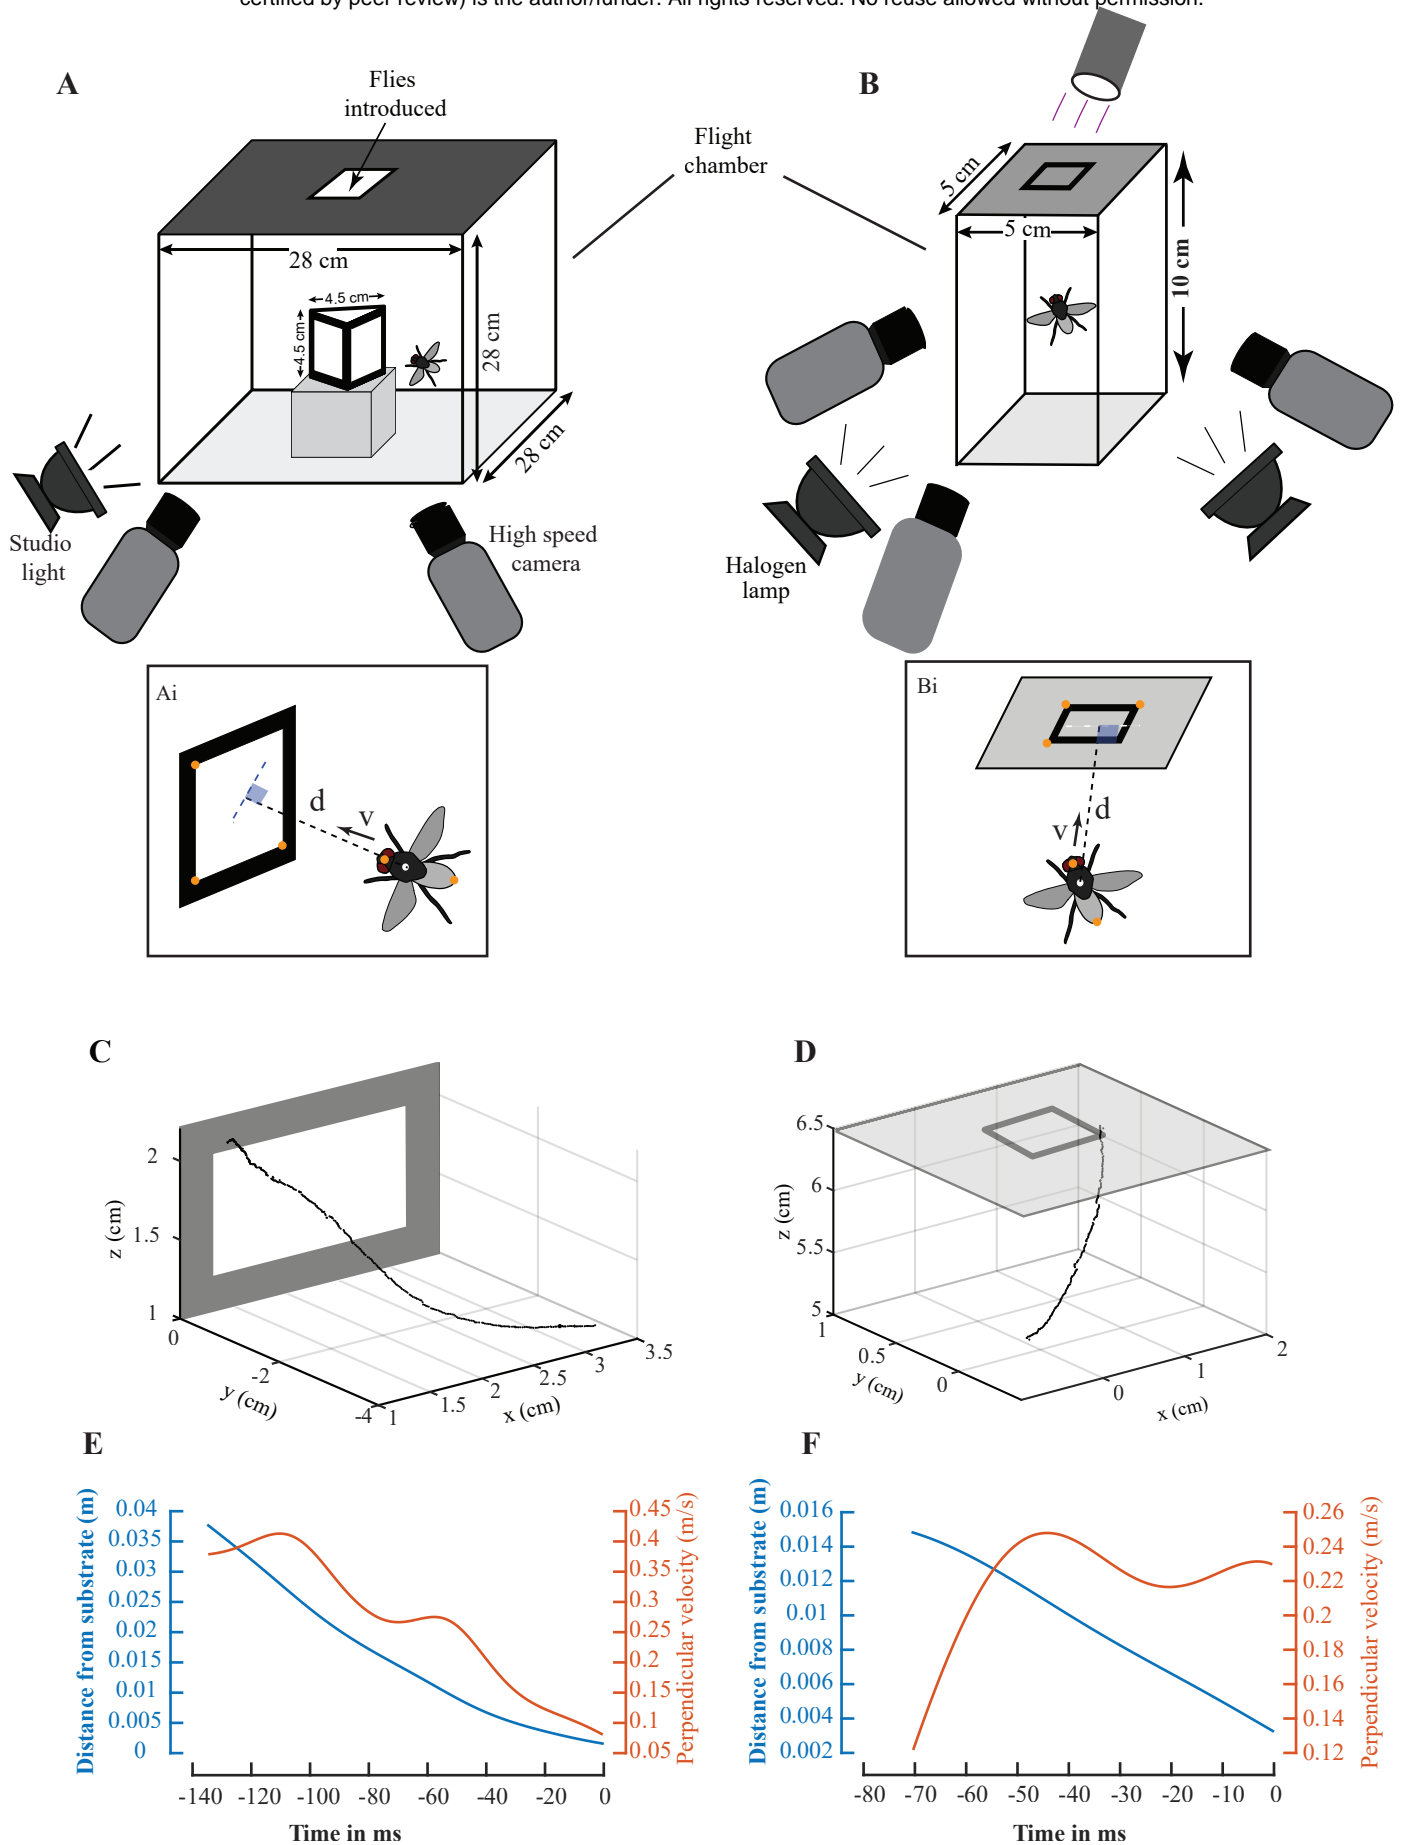



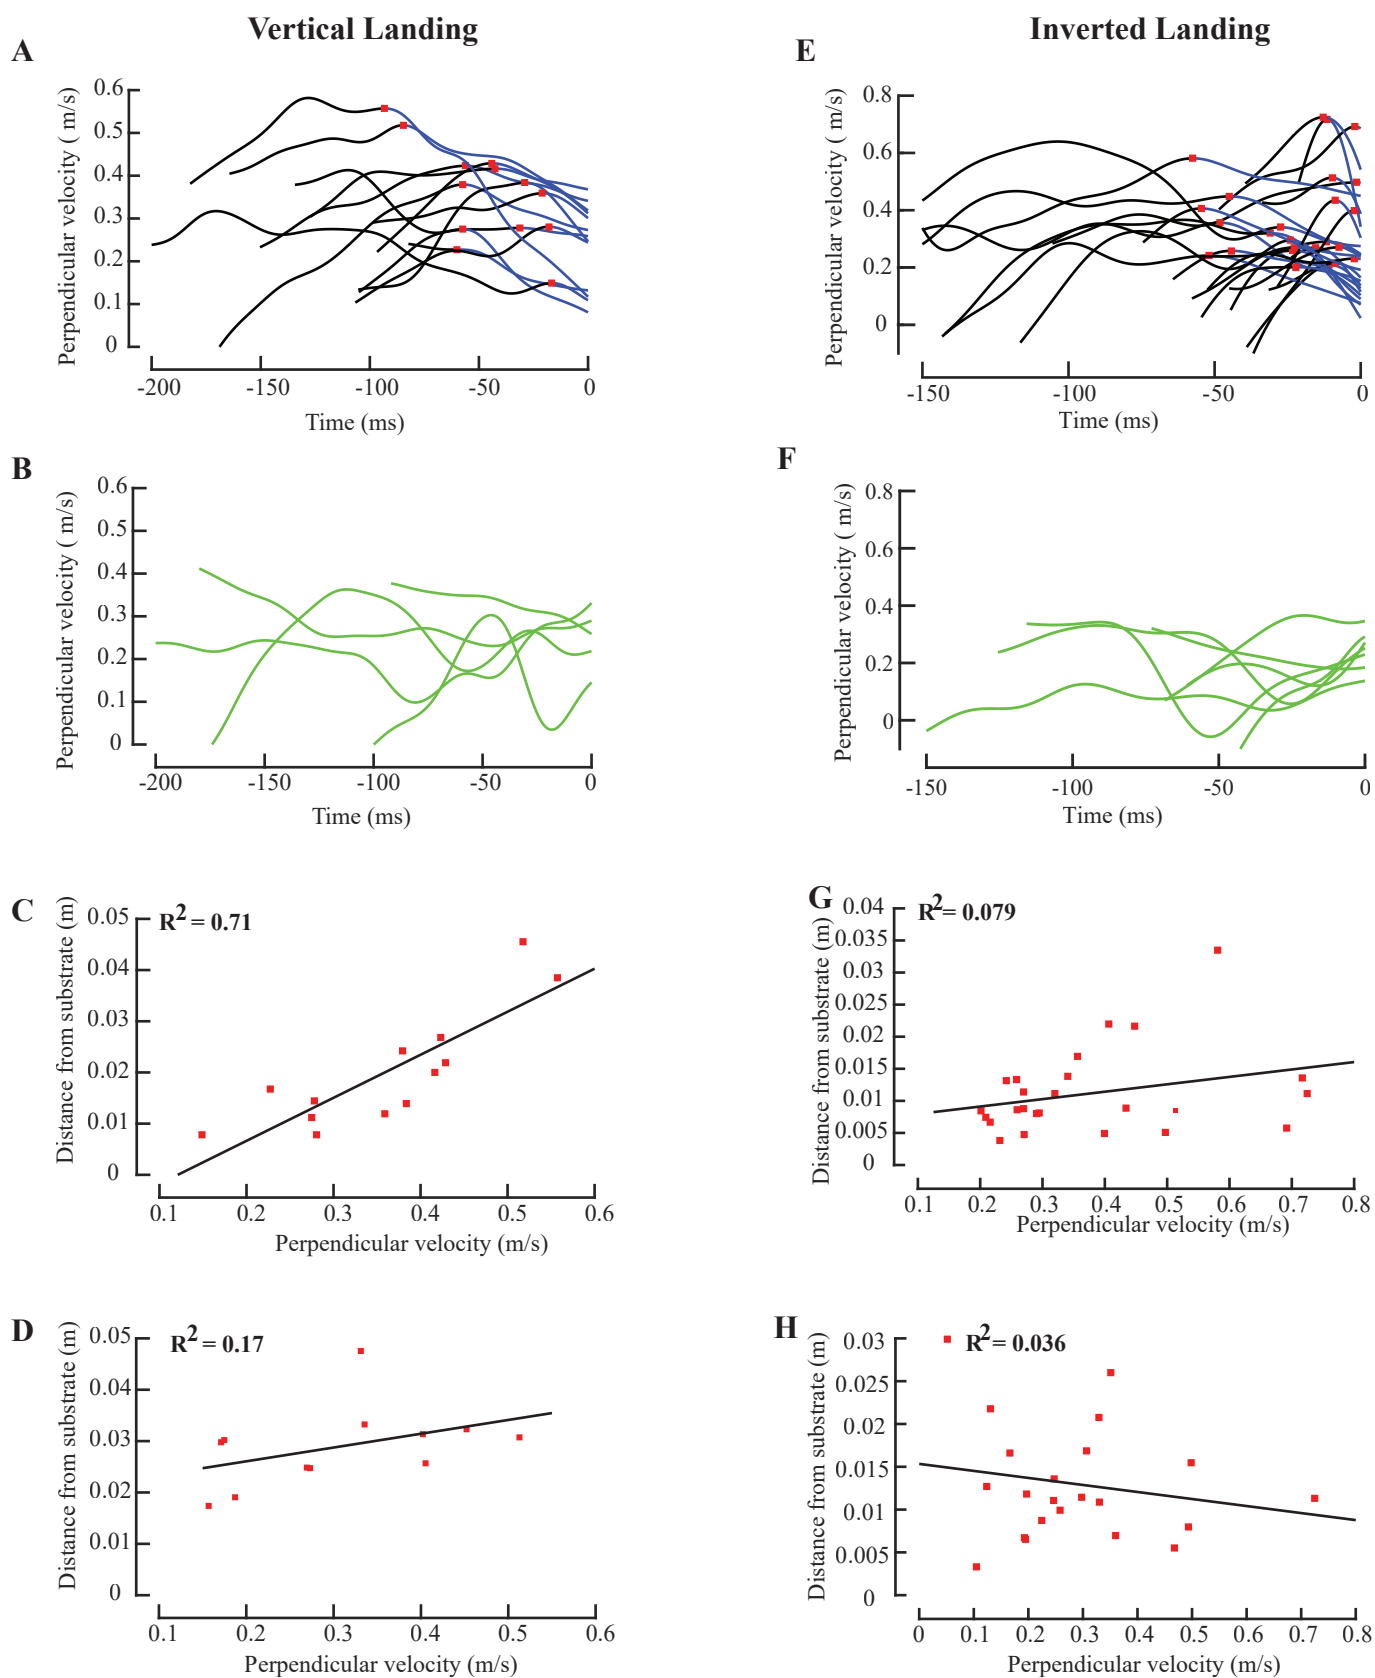

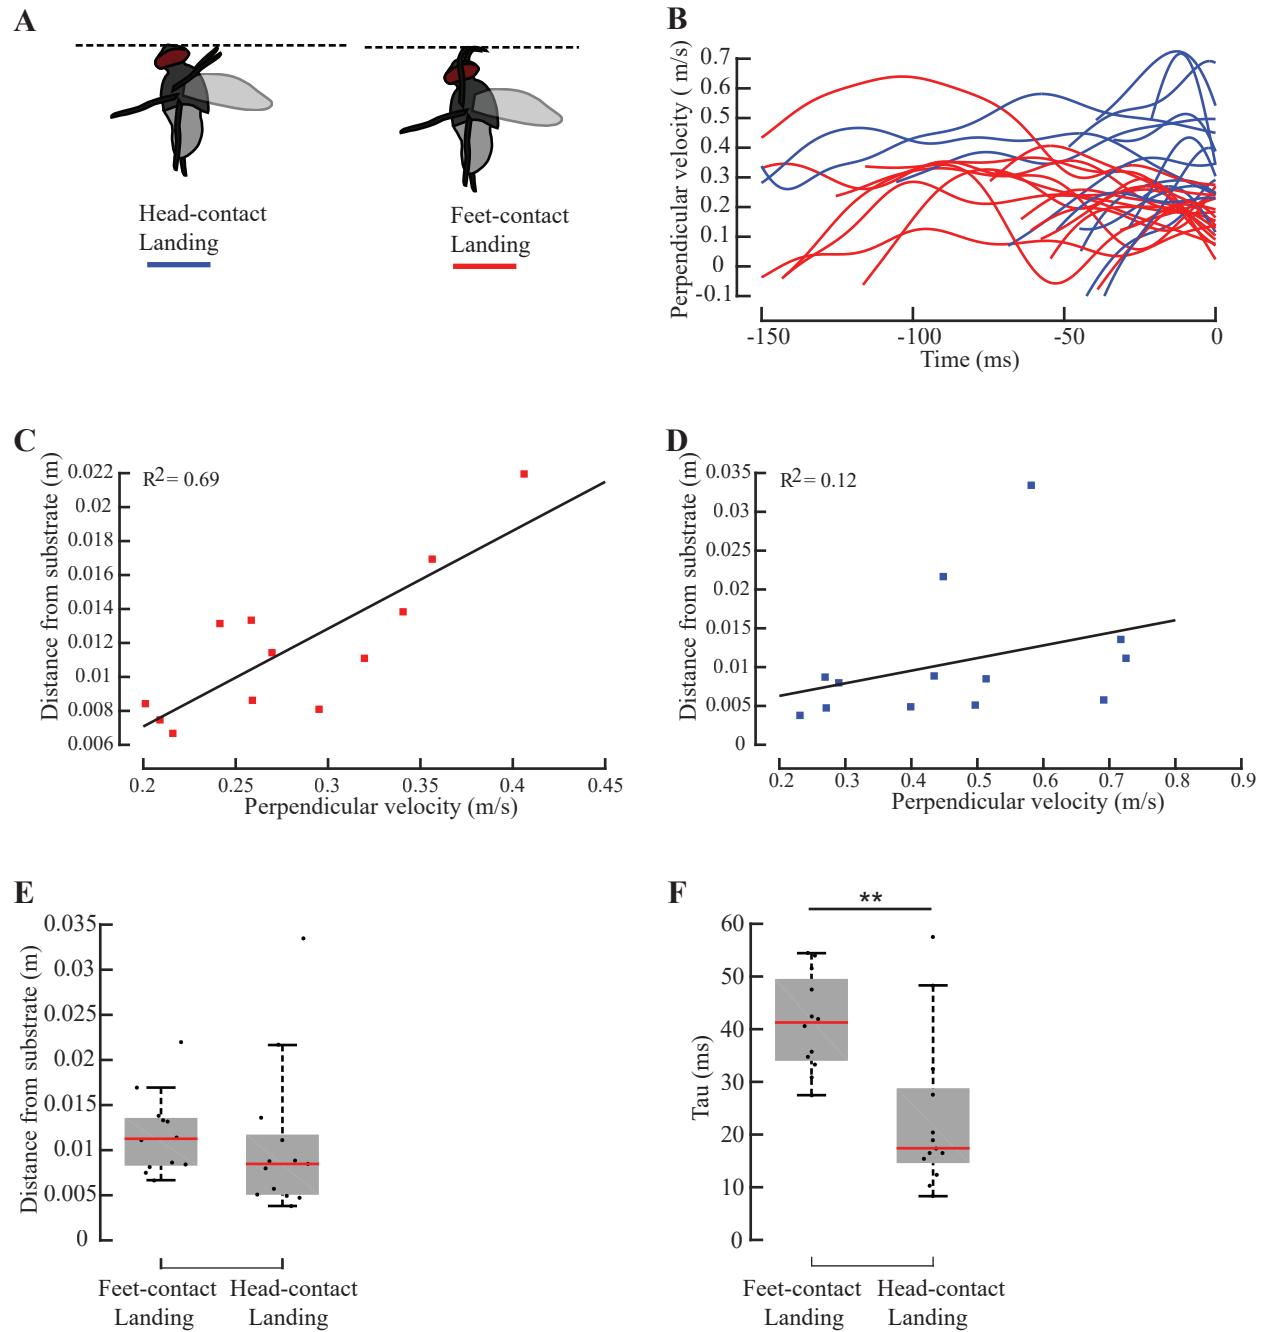

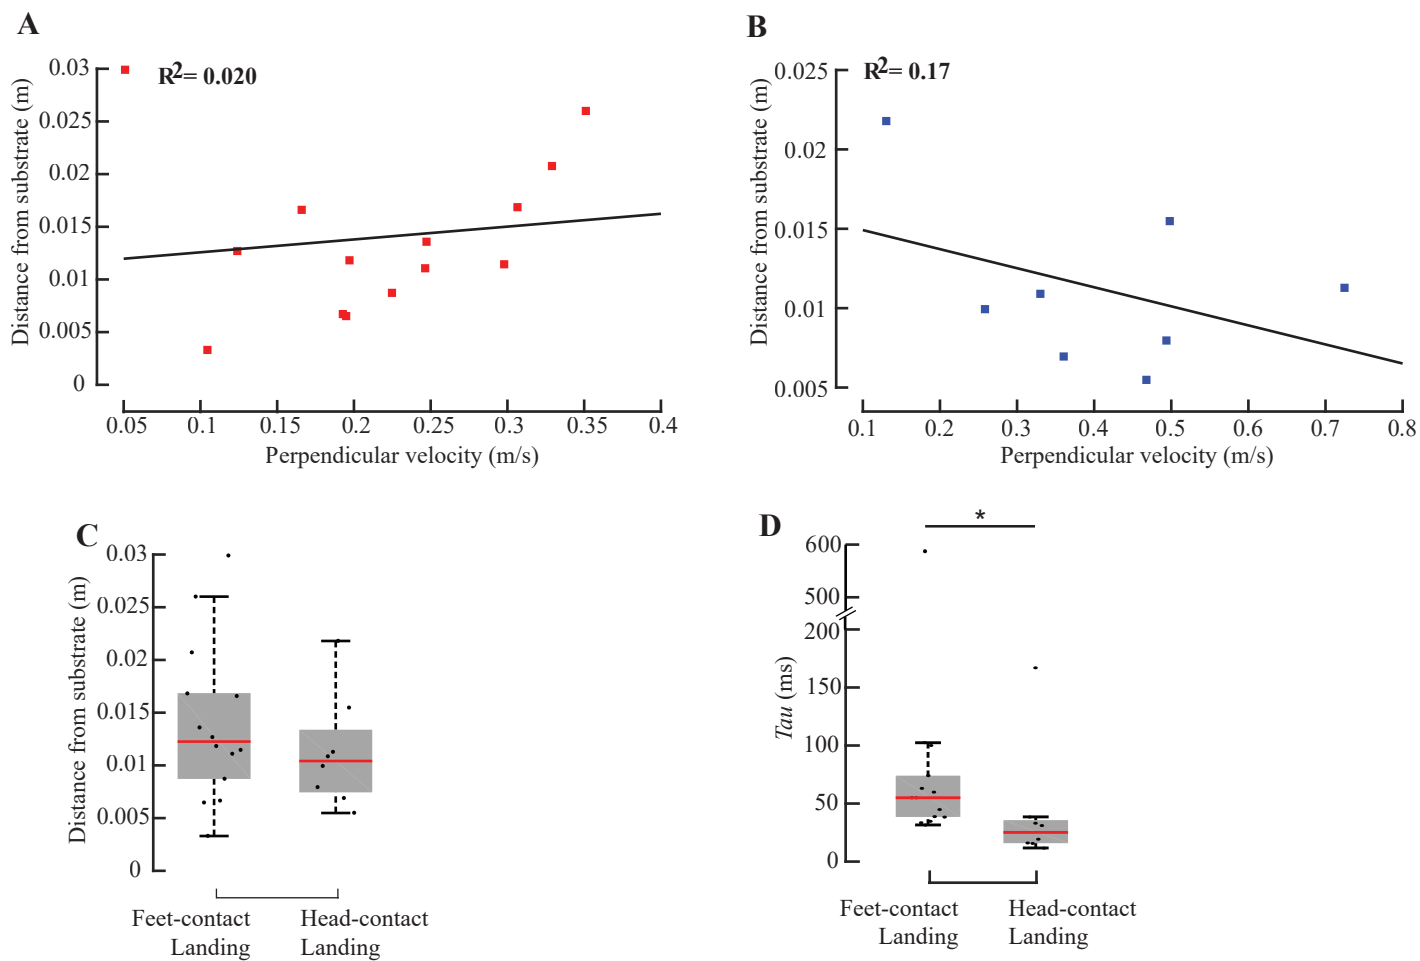

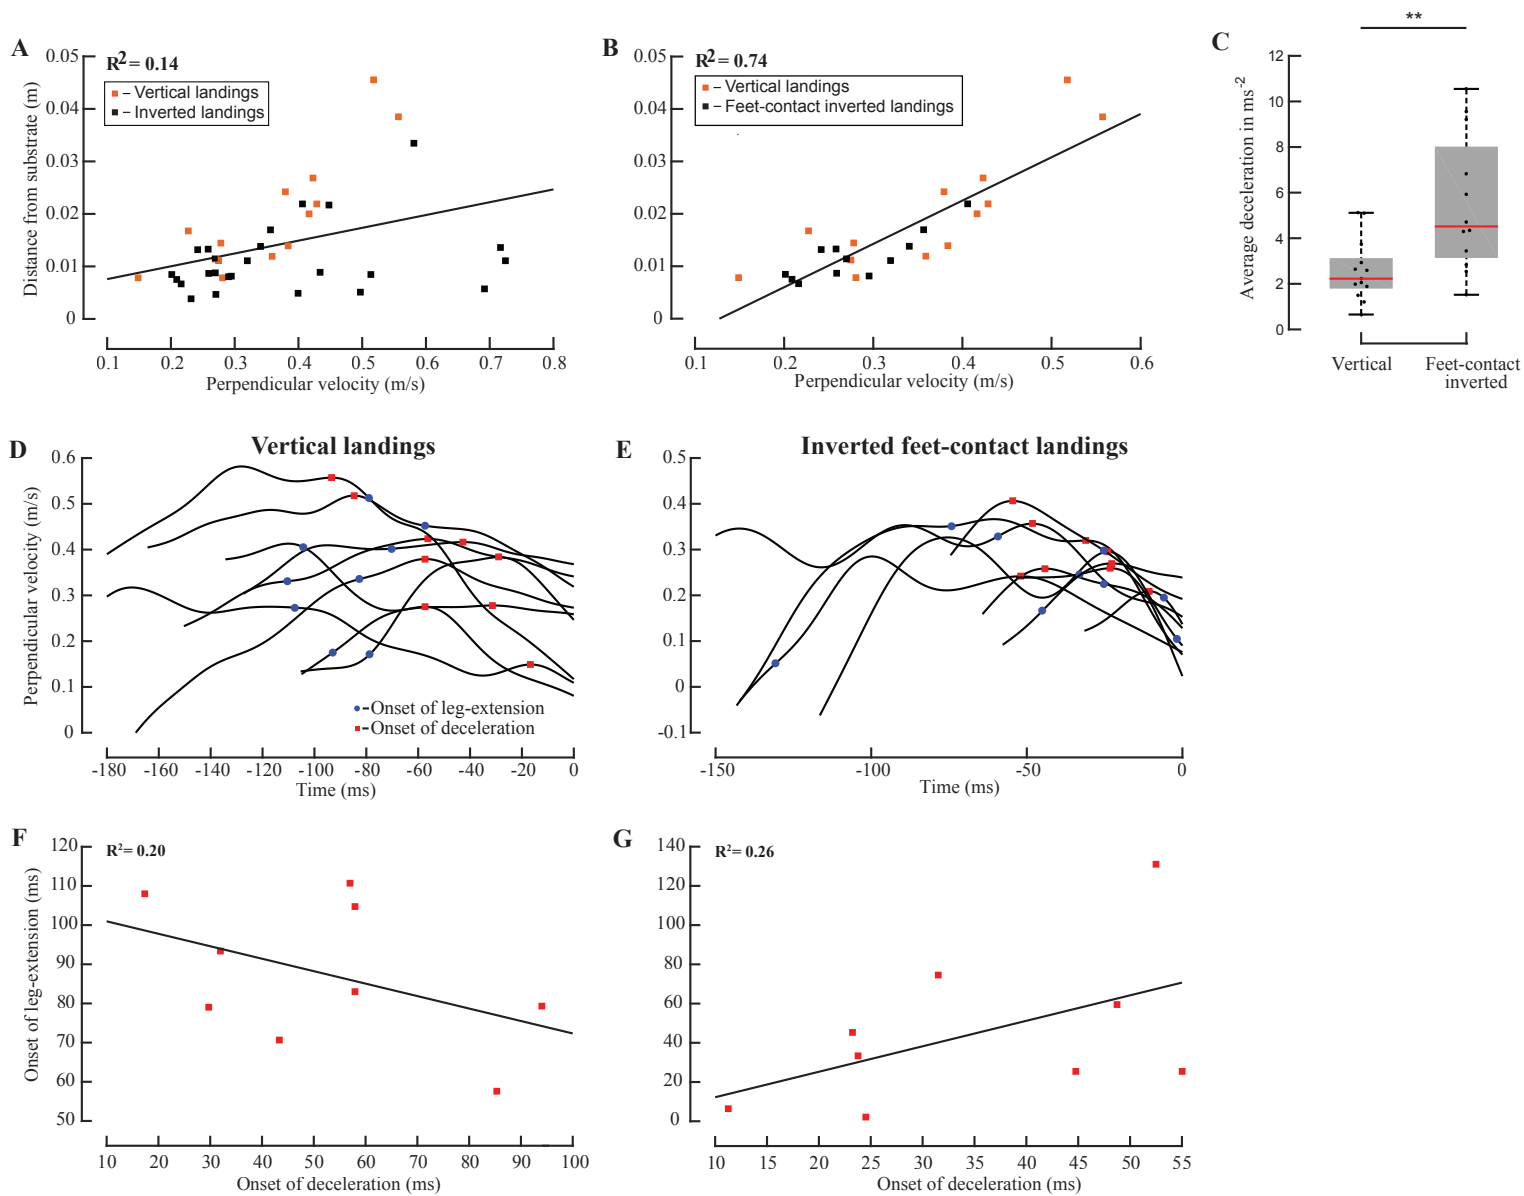

Source: http://biorxiv.org/content/10.1101/448472v1.full.pdf
